# Supplementary material for: Comprehensive Analysis of PHGDH for Predicting Prognosis and Immunotherapy Response in Patients with Endometrial Carcinoma
Source: Research Square preprint supplement (doi:10.21203/rs.3.rs-2210779/v1), 2022-11-09
Supplement: Supplementary file 1 [file 67edfc0957967562e457604b.xlsx]

## Sheet: Sheet 1
Characteristics	Total(N)	HR(95% CI) Univariate analysis	P value Univariate analysis	HR(95% CI) Multivariate analysis	P value Multivariate analysis
Clinical stage	551
Stage I	341	Reference
Stage III&Stage IV&Stage II	210	2.527 (1.780-3.587)	<0.001	2.270 (1.462-3.525)	<0.001
Histological type	527
Endometrioid	409	Reference
Serous	118	2.125 (1.466-3.081)	<0.001	1.446 (0.887-2.356)	0.139
Histologic grade	540
G1&G2	218	Reference
G3	322	2.088 (1.391-3.136)	<0.001	1.203 (0.723-2.002)	0.476
Age	549
<=60	206	Reference
>60	343	1.353 (0.934-1.961)	0.110
Tumor invasion(%)	473
<50	259	Reference
>=50	214	1.885 (1.289-2.756)	0.001	1.411 (0.916-2.173)	0.118
PHGDH	551
Low	275	Reference
High	276	1.614 (1.132-2.300)	0.008	1.594 (1.027-2.474)	0.038
Menopause status	505
Pre	35	Reference
Peri&Post	470	1.530 (0.673-3.477)	0.310
