# Supplementary material for: Comprehensive Analysis of PHGDH for Predicting Prognosis and Immunotherapy Response in Patients with Endometrial Carcinoma
Source: Research Square preprint supplement (doi:10.21203/rs.3.rs-2210779/v1), 2022-11-09
Supplement: Supplementary file 2 [file 788a6ea7fd671e2de27ab9bb.xlsx]

## Sheet: Sheet1
Characteristic	Low expression of PHGDH	High expression of PHGDH	p
n	276	276
Clinical stage, n (%)			0.085
Stage I	183 (33.2%)	159 (28.8%)
Stage II	27 (4.9%)	24 (4.3%)
Stage III	55 (10%)	75 (13.6%)
Stage IV	11 (2%)	18 (3.3%)
Primary therapy outcome, n (%)			0.006
PD	7 (1.5%)	13 (2.7%)
SD	4 (0.8%)	2 (0.4%)
PR	1 (0.2%)	11 (2.3%)
CR	228 (47.5%)	214 (44.6%)
Race, n (%)			0.905
Asian	9 (1.8%)	11 (2.2%)
Black or African American	54 (10.7%)	54 (10.7%)
White	190 (37.5%)	189 (37.3%)
Age, n (%)			0.238
<=60	110 (20%)	96 (17.5%)
>60	164 (29.9%)	179 (32.6%)
Weight, n (%)			0.167
<=80	114 (21.6%)	129 (24.4%)
>80	152 (28.8%)	133 (25.2%)
BMI, n (%)			0.578
<=30	103 (19.8%)	109 (21%)
>30	158 (30.4%)	149 (28.7%)
Histological type, n (%)			< 0.001
Endometrioid	227 (41.1%)	183 (33.2%)
Mixed	12 (2.2%)	12 (2.2%)
Serous	37 (6.7%)	81 (14.7%)
Residual tumor, n (%)			0.994
R0	184 (44.6%)	191 (46.2%)
R1	11 (2.7%)	11 (2.7%)
R2	8 (1.9%)	8 (1.9%)
Histologic grade, n (%)			< 0.001
G1	70 (12.9%)	28 (5.2%)
G2	69 (12.8%)	51 (9.4%)
G3	132 (24.4%)	191 (35.3%)
Tumor invasion(%), n (%)			0.202
<50	138 (29.1%)	121 (25.5%)
>=50	101 (21.3%)	114 (24.1%)
Menopause status, n (%)			0.688
Pre	18 (3.6%)	17 (3.4%)
Peri	10 (2%)	7 (1.4%)
Post	221 (43.7%)	233 (46%)
Hormones therapy, n (%)			0.786
No	148 (43%)	149 (43.3%)
Yes	25 (7.3%)	22 (6.4%)
Diabetes, n (%)			0.885
No	161 (35.7%)	167 (37%)
Yes	62 (13.7%)	61 (13.5%)
Radiation therapy, n (%)			0.825
No	141 (26.8%)	138 (26.2%)
Yes	122 (23.1%)	126 (23.9%)
Age, meidan (IQR)	63 (56, 71)	64 (58, 72)	0.183
