# Supplementary material for: Comprehensive Analysis of PHGDH for Predicting Prognosis and Immunotherapy Response in Patients with Endometrial Carcinoma
Source: Research Square preprint supplement (doi:10.21203/rs.3.rs-2210779/v1), 2022-11-09
Supplement: Supplementary file 3 [file b28b9cb4cc1586236e8919cc.xlsx]

## Sheet: Sheet 1
Characteristics	Total(N)	Odds Ratio(OR)	P value
Clinical stage (Stage II-IV vs. Stage I)	552	1.448 (1.026-2.048)	0.036*
Primary therapy outcome (CR vs. PD&SD&PR)	480	0.433 (0.206-0.862)	0.021*
Age (>60 vs. <=60)	549	1.251 (0.885-1.770)	0.205
Weight (>80 vs. <=80)	528	0.773 (0.548-1.089)	0.142
BMI (>30 vs. <=30)	519	0.891 (0.628-1.265)	0.519
Histological type (Serous vs. Endometrioid)	528	2.716 (1.770-4.232)	<0.001*
Residual tumor (R1&R2 vs. R0)	413	0.963 (0.492-1.886)	0.913
Histologic grade (G2&G3 vs. G1)	541	3.010 (1.888-4.912)	<0.001*
Tumor invasion(%) (>=50 vs. <50)	474	1.287 (0.896-1.851)	0.172
Menopause status (Peri&Post vs. Pre)	506	1.100 (0.551-2.203)	0.786
Diabetes (Yes vs. No)	451	0.949 (0.626-1.436)	0.803
